# Supplementary material
Source: PubMed Central journal article supplement (PMC2729710)
Supplement: NIHMS121458-supplement-2.pdf [file NIHMS121458-supplement-2.pdf]

**Supplementary Table 1.** Primers used for molecular biology work.

| For creation of plasmids <sup>a</sup> : | Primer Name   | Sequence <sup>b</sup> (5' – 3')                            |
|-----------------------------------------|---------------|------------------------------------------------------------|
| <b>Cloning primers</b>                  |               |                                                            |
| pPorTAtB-C<br>(PorT+ mutant)            | PorTFrBxbalF  | ac <b>TCTAGA</b> AGTGGCGCATATCCTTGCA                       |
|                                         | PorTFrBPstIR2 | tata <b>CTGCAG</b> ACCTTCAGAACCGGAATCTGA                   |
|                                         | tetQXmalF     | tata <b>CCCGGG</b> ACAACGAATTATCTCCTAACGT                  |
|                                         | tetQXbalR     | cgc <b>TCTAGA</b> TTTTTATTGCCAAGTTCTAATGCT                 |
|                                         | PorTSaclF     | at <b>GAGCTC</b> CGTATATAGTCCACGGCTTGCT                    |
|                                         | PorTSmaIR     | aata <b>CCCGGG</b> CCACTGACCTGTGCGAAAAGAG                  |
| <b>Mutagenesis primers</b>              |               |                                                            |
| pΔPorT-C<br>(ΔPorT mutant)              | DelPorTFA     | <b>TGAAGATTATTCTCTCAG</b> TAGTTGTCACGCTCTTTTCGAC           |
|                                         | DelPorTFB     | TAGTTGTCACGCTCTTTTCGACA                                    |
|                                         | DelPorTRA     | <b>CTGAGAGAATAATCTTCA</b> ATTCTTTATTTGGTGTGT               |
|                                         | DelPorTRB     | ATTCTTTATTTGGTGTGTAAGATCAACGC                              |
| p6HPorT-A<br>(6H33 mutant)              | 6HPorTFA      | <b>CATCACCATCACCATCAC</b> GTACAAAATCGCCCCTACGC             |
|                                         | 6HPorTFB      | GTACAAAATCGCCCCTACGC                                       |
|                                         | 6HPorTRA      | <b>GTGATGGTGTATGGTGTATG</b> TTTTTCCGTTTGCGCCGA             |
|                                         | 6HPorTRB      | TTTTTCCGTTTGCGCCGACA                                       |
| pPorT6HPYA-A<br>(6H37 mutant)           | Por6HPYAFA    | <b>CATCACCATCACCATCAC</b> CCCTACGCCGACTACAAAC              |
|                                         | Por6HPYAFB    | CCCTACGCCGACTACAAAC                                        |
|                                         | Por6HPYARA    | <b>GTGATGGTGTATGGTGTATG</b> GCGATTTTGTACTTTTTCCGTTTG       |
|                                         | Por6HPYARB    | GCGATTTTGTACTTTTTCCGTTTG                                   |
| pPorT6HEGS-A<br>(6H67 mutant)           | Por6HEGSFA    | <b>CATCACCATCACCATCAC</b> GAAGGGAGTACGTGCGACTC             |
|                                         | Por6HEGSFB    | GAAGGGAGTACGTGCGACTC                                       |
|                                         | Por6HEGSRA    | <b>GTGATGGTGTATGGTGTATG</b> GGGTACAAACCCGTTGTTG            |
|                                         | Por6HEGSRB    | GGGTACAAACCCGTTGTTG                                        |
| pPorT6HPNL-A<br>(6H97 mutant)           | Por6HPNLFA    | <b>CATCACCATCACCATCAC</b> CCCAATCTGAATTTACGTTTGCT          |
|                                         | Por6HPNLFB    | CCCAATCTGAATTTACGTTTGCT                                    |
|                                         | Por6HPNLRA    | <b>GTGATGGTGTATGGTGTATG</b> CAGAAGGAACATATCACCGATCA        |
|                                         | Por6HPNLRB    | CAGAAGGAACATATCACCGATCA                                    |
| pPorT6HKPV-B<br>(6H121 mutant)          | Por6HKPVFA    | <b>CATCACCATCACCATCAC</b> AAACCCGTGGCCTCTTTC               |
|                                         | Por6HKPVFB    | AAACCCGTGGCCTCTTTC                                         |
|                                         | Por6HKPVRA    | <b>GTGATGGTGTATGGTGTATG</b> CTCCCCATCGGAAAAGACAA           |
|                                         | Por6HKPVRB    | CTCCCCATCGGAAAAGACAA                                       |
| pPorT6HFPL-B<br>(6H135 mutant)          | Por6HFPLFA    | <b>CATCACCATCACCATCAC</b> TTTCCGCTATTATTGAAATATGGTTCTC     |
|                                         | Por6HFPLFB    | TTTCCGCTATTATTGAAATATGGTTCTC                               |
|                                         | Por6HFPLRA    | <b>GTGATGGTGTATGGTGTATG</b> TTCCAAATAATTGGATCGAACGGA       |
|                                         | Por6HFPLRB    | TTCCAAATAATTGGATCGAACGGA                                   |
| pPorT6HNNM-B<br>(6H147 mutant)          | Por6HNNMFA    | <b>CATCACCATCACCATCAC</b> AACAATATGCGTCCATACCTCAT          |
|                                         | Por6HNNMFB    | AACAATATGCGTCCATACCTCAT                                    |
|                                         | Por6HNNMRA    | <b>GTGATGGTGTATGGTGTATG</b> CAGGCGCCGAGAACCATA             |
|                                         | Por6HNNMRB    | CAGGCGCCGAGAACCATA                                         |
| pPorT6HLEI-A<br>(6H169 mutant)          | Por6HLEIFA    | <b>CATCACCATCACCATCAC</b> TTGGAGATTTATACCAAAGCGAACGA       |
|                                         | Por6HLEIFB    | TTGGAGATTTATACCAAAGCGAACGA                                 |
|                                         | Por6HLEIRA    | <b>GTGATGGTGTATGGTGTATG</b> CCCCCTTCTTCGCCCCAG             |
|                                         | Por6HLEIRB    | CCCCCTTCTTCGCCCCAG                                         |
| pPorT6HPFF-B<br>(6H191 mutant)          | Por6HPFFFA    | <b>CATCACCATCACCATCAC</b> CCCTTTTTTCAAATTGTGCCCCGAACCT     |
|                                         | Por6HPFFFB    | CCTTTTTTCAAATTGTGCCCCGAACCT                                |
|                                         | Por6HPFFRA    | <b>GTGATGGTGTATGGTGTATG</b> CAGGTAATAATCGCATCCGAGACC       |
|                                         | Por6HPFFRB    | CAGGTAATAATCGCATCCGAGACC                                   |
| pPorT6HPEL-A<br>(6H197 mutant)          | Por6HPELFA    | <b>CATCACCATCACCATCAC</b> CCCGAAGTGGCCTTTAGC               |
|                                         | Por6HPELFB    | CCCGAAGTGGCCTTTAGC                                         |
|                                         | Por6HPELRA    | <b>GTGATGGTGTATGGTGTATG</b> GCACAATTTGAAAAAAGGCAGGTAAAAATC |
|                                         | Por6HPELRB    | GCACAATTTGAAAAAAGGCAGGTAAAAATC                             |
| pPorT6HRPD-A<br>(6H213 mutant)          | Por6HRPDFA    | <b>CATCACCATCACCATCAC</b> CGTCTGATCTTTGGATGATTATAAGT       |
|                                         | Por6HRPDFB    | CGTCTGATCTTTGGATGATTATAAGT                                 |
|                                         | Por6HRPDRA    | <b>GTGATGGTGTATGGTGTATG</b> CTCGTGTGTGATAACATCGGGAA        |
|                                         | Por6HRPDRB    | CTCGTGTGTGATAACATCGGGAA                                    |

|                                  |                 |                                                             |
|----------------------------------|-----------------|-------------------------------------------------------------|
| pPorT6H-A<br>(6H244 mutant)      | PorT6HFA        | <b>CATCACCATCACCATCACT</b> AGTTGTCACGCTCTTTTCGACA           |
|                                  | DelPorTFB       | TAGTTGTCACGCTCTTTTCGACA                                     |
|                                  | PorT6HRA        | <b>GTGATGGTGTGATGGTGTG</b> CTCGAAATTGAACGTAAGCATAATCA       |
|                                  | PorT6HRB        | CTCGAAATTGAACGTAAGCATAATCATT                                |
| pPorTStrRPD-A<br>(Str213 mutant) | PorTStrRPDFA    | <b>TGGTCTCATCCTCAGTTTCGAAAAG</b> CGTCCTGATCTTTTGGATGATTATAA |
|                                  | Por6HRPDFB      | CGTCCTGATCTTTTGGATGATTATAAGT                                |
|                                  | PorTStrRPDRA    | <b>CTTTTCGAACTGAGGATGAGACCA</b> CTCGTGTGTGATAACATCGG        |
|                                  | Por6HRPDRB      | CTCGTGTGTGATAACATCGGGAA                                     |
| <b>Real-time PCR primers</b>     |                 |                                                             |
| <i>rgpB</i> gene                 | RgpBTMF         | CGATCGTAGCATTCTCCTCTCTGTTG                                  |
|                                  | RgpBTMR         | CAGCGGAGAGCAGTCGTA                                          |
| <i>gyrA</i> gene                 | GyrATMF2        | GGGATCGGATACTCGCGAAGA                                       |
|                                  | GyrATMR         | GGATTCATACACCTTCAGCCAATAGCA                                 |
|                                  | hGyrAProbeBFQ   | ACTCGGCCTCCATGCACGCCACC                                     |
| <i>porT</i> gene                 | PgPorTTMF       | AGAGTCGCTCTCTTTGCCTGAT                                      |
|                                  | PgPorTTMR       | TGGAATCCAAGATGATAGCGTTTGTAGTC                               |
|                                  | fPgPorTProbeBFQ | CCTGGGCCGGACGTACGCTGTCG                                     |

<sup>a</sup> Named plasmids used for double crossover into *P. gingivalis* to create the desired mutant (in brackets).

<sup>b</sup> Restriction sites are in bold and irrelevant bases for ease of restriction digest are in lowercase. Complementary overhangs for the SLIM mutagenesis technique are in bold italics.

**Supplementary Figure 1.** Pigmentation of PorT mutants after 3 days growth on blood agar.

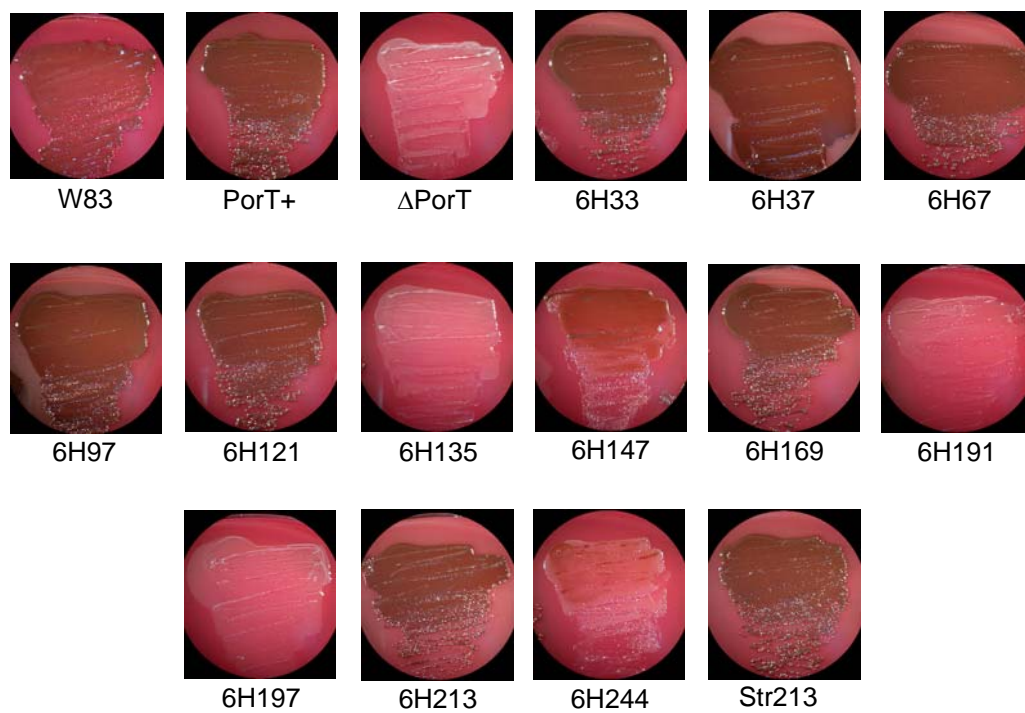

**Supplementary Figure 2.** Growth curve of PorT mutants in eTSB media. Pre-warmed 5 mL media in Teflon-capped tubes was inoculated with a 1:50 inoculum of an overnight starter culture that has been adjusted to OD<sub>600</sub> 1.0 using fresh media. Absorbance at 600 nm was measured at pre-determined time points and data shown were averaged from quadruplicate cultures with the SEM falling between 1-10% of the observed OD value. Mutants with fully functional PorT are represented with green lines, those with partially defective PorT with orange lines and non-functional PorT with red lines. Two independent runs gave similar results.

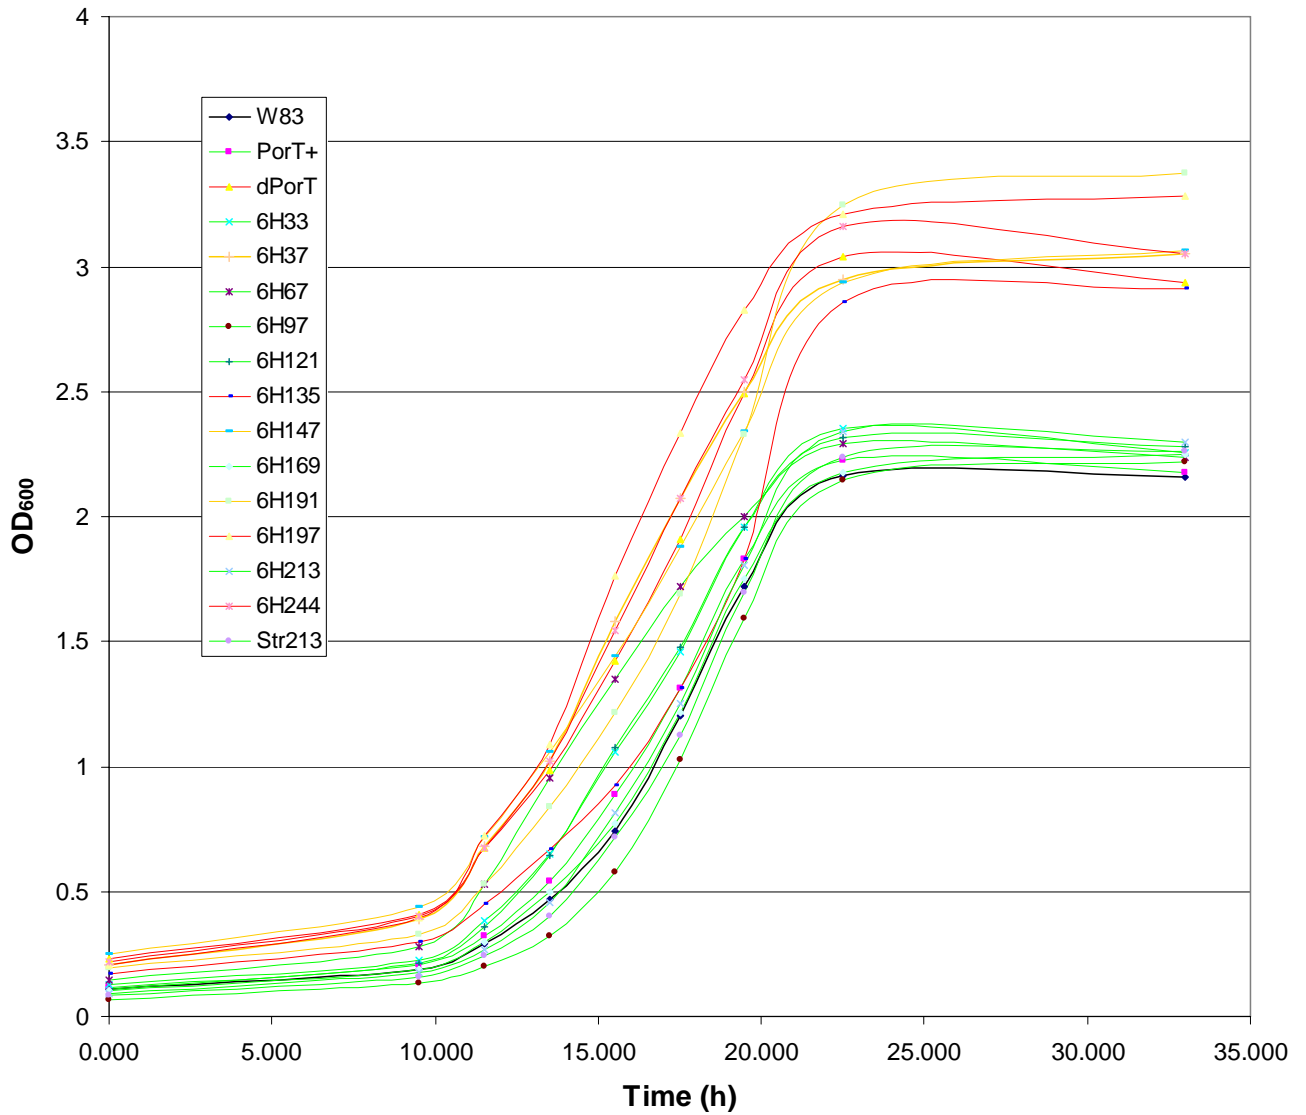

**Supplemental Figure 3.** Multiple alignment of PorT homologues in sequenced genomes using the ClustalW program at the European Bioinformatics Institute ([www.ebi.ac.uk/clustalw/](http://www.ebi.ac.uk/clustalw/)) and displayed using the JalView program (1). Highly conserved regions of predicted transmembrane  $\beta$ -sheets are indicated by yellow bars above the alignment. Arrowheads indicate the 6 $\times$ His insertion sites in PorT of *P. gingivalis* along with the mutant names (boxed). Mutants with fully functional PorT are represented in green, those with partially defective PorT in orange and non-functional PorT in red.

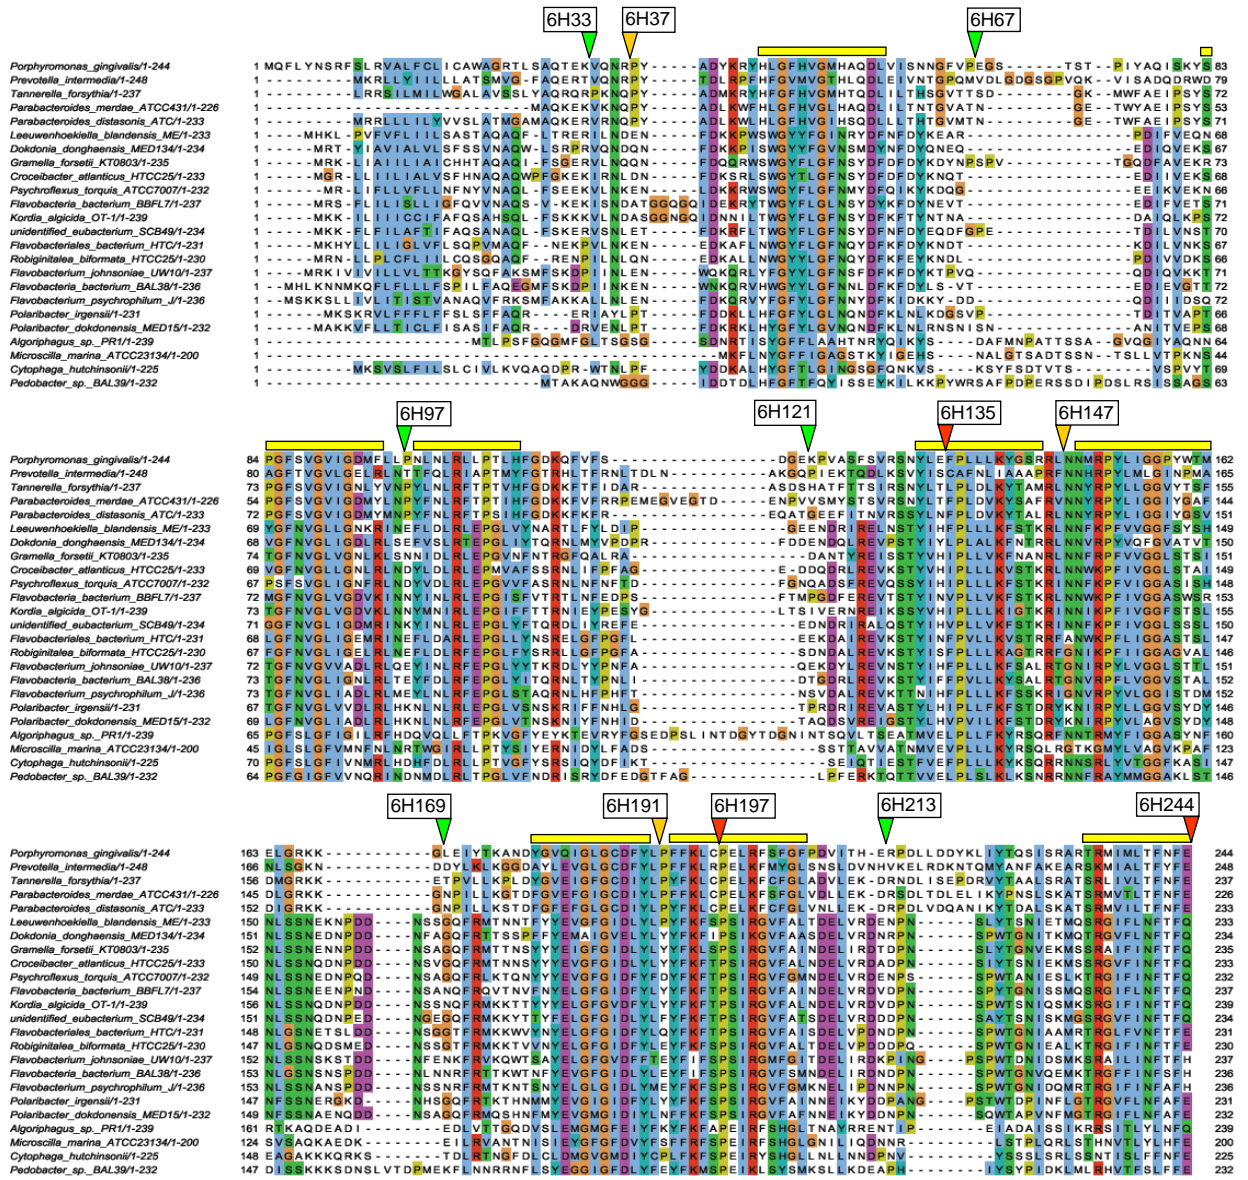

Reference:

1. Clamp, M., J. Cuff, S. M. Searle, and G. J. Barton. 2004. The Jalview Java alignment editor. *Bioinformatics* 20:426-7.
